# Supplementary material for: Binary catalytic system for homo- and block copolymerization of ε-caprolactone with δ-valerolactone
Source: Royal Society of Chemistry journal article supplement (doi:10.1039/d0ra04974c), 2020-01-01
Supplement: d0ra04974c1.pdf [file d0ra04974c1.pdf]

## Supporting Information

# Binary Catalytic System for Homo- and Block Copolymerization of $\epsilon$ -Caprolactone with $\delta$ -valerolactone

Yan Wang<sup>a</sup>, Yongle Han<sup>b</sup>, Lifang Zhang<sup>a,b,c\*</sup>

<sup>a</sup>The Center of Analysis and Test, Shanxi Normal University, Linfen 041004, P.R. China

<sup>b</sup>School of Chemistry & Material Science, Shanxi Normal University, Linfen 041004, P.R. China

<sup>c</sup>Collaborative Innovation Center for Shanxi Advanced Permanent Magnetic Materials and Technology, Linfen 041004, P.R. China

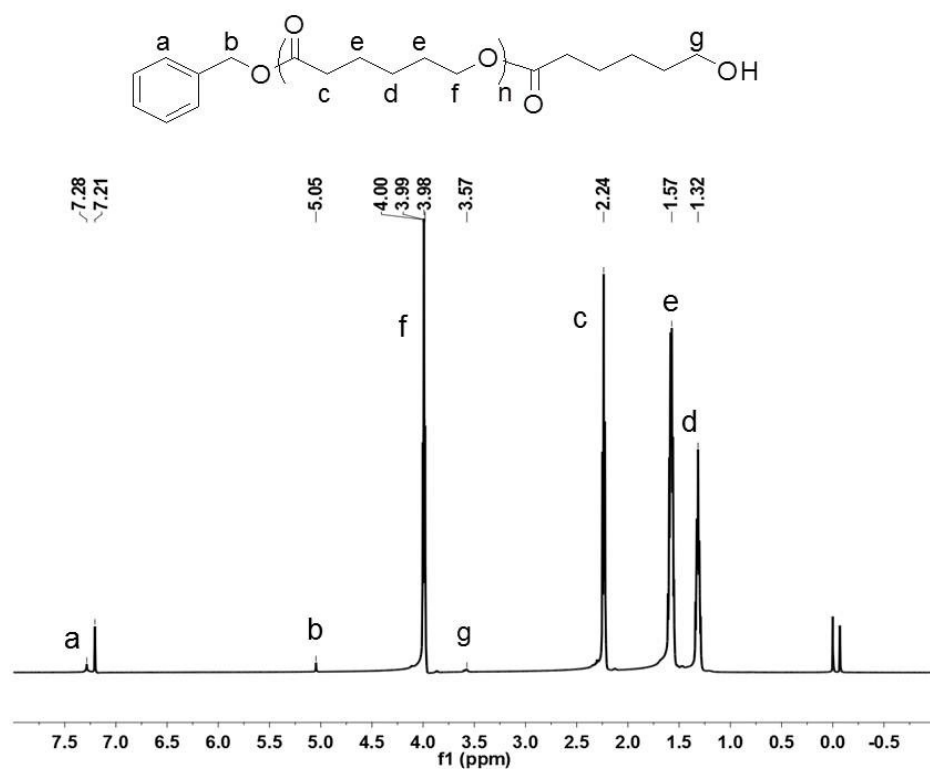

Fig. S1 <sup>1</sup>H NMR spectra of PCL.

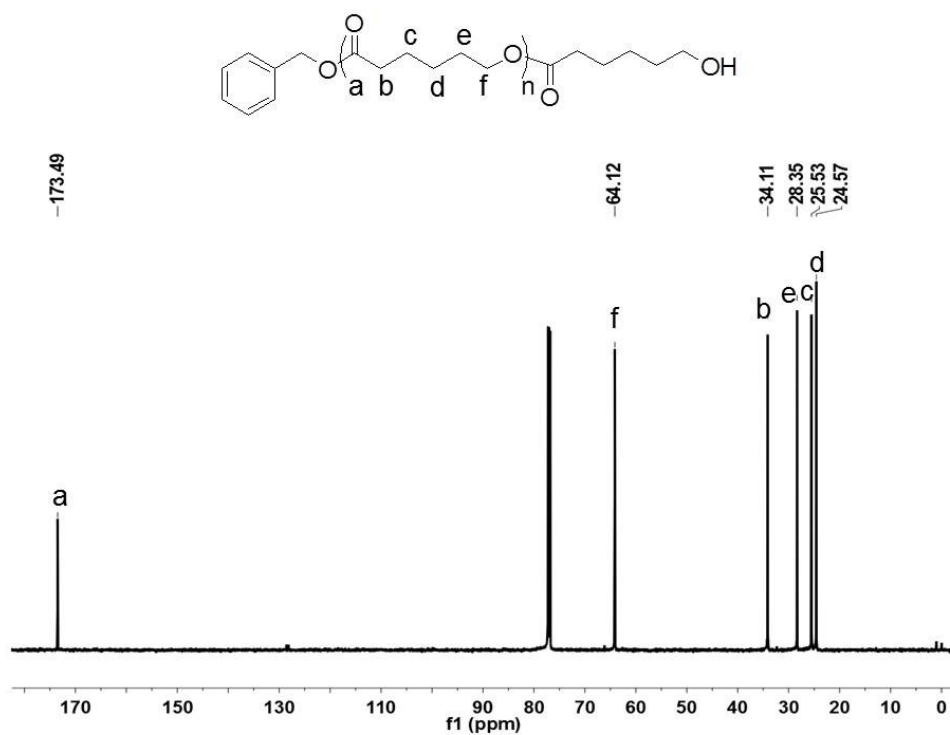

Fig. S2 <sup>13</sup>C NMR spectra of PCL.

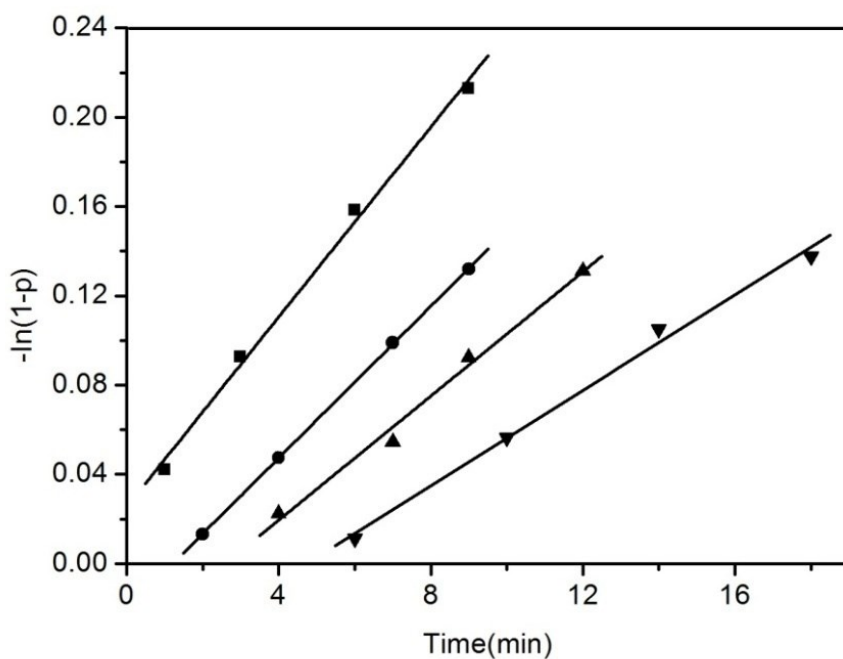

Fig. S3  $-\ln(1-p)$  as a function of time with different catalyst concentration.  
 Conditions: [CL] = 2.0 mol/L, [ITU]/[YCl<sub>3</sub>] = 1:1, [CL]/[BnOH] = 100:1, 25°C, in toluene.

■ [C] = 12.5 × 10<sup>-3</sup> mol/L  
 ▲ [C] = 8.33 × 10<sup>-3</sup> mol/L

● [C] = 10 × 10<sup>-3</sup> mol/L  
 ▼ [C] = 6.67 × 10<sup>-3</sup> mol/L

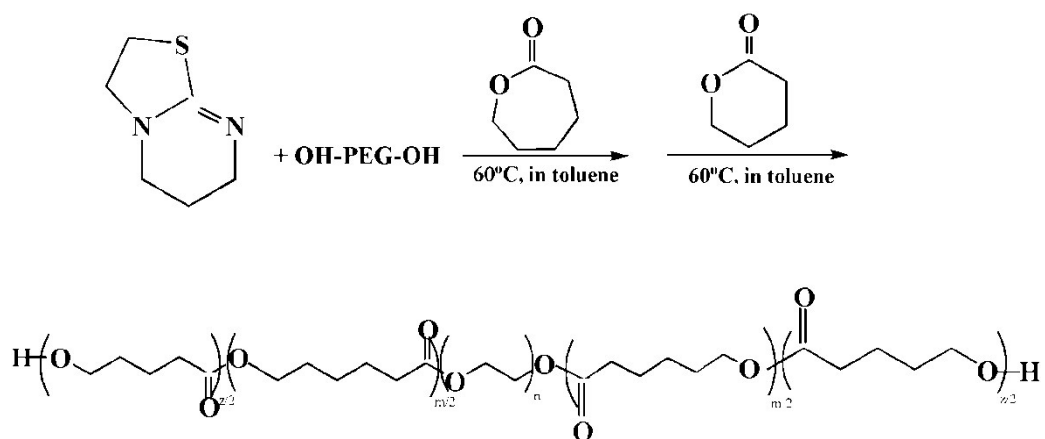

**Scheme S1** Synthesis of PVL-PCL-PEG-PCL-PVL pentablock copolymer.

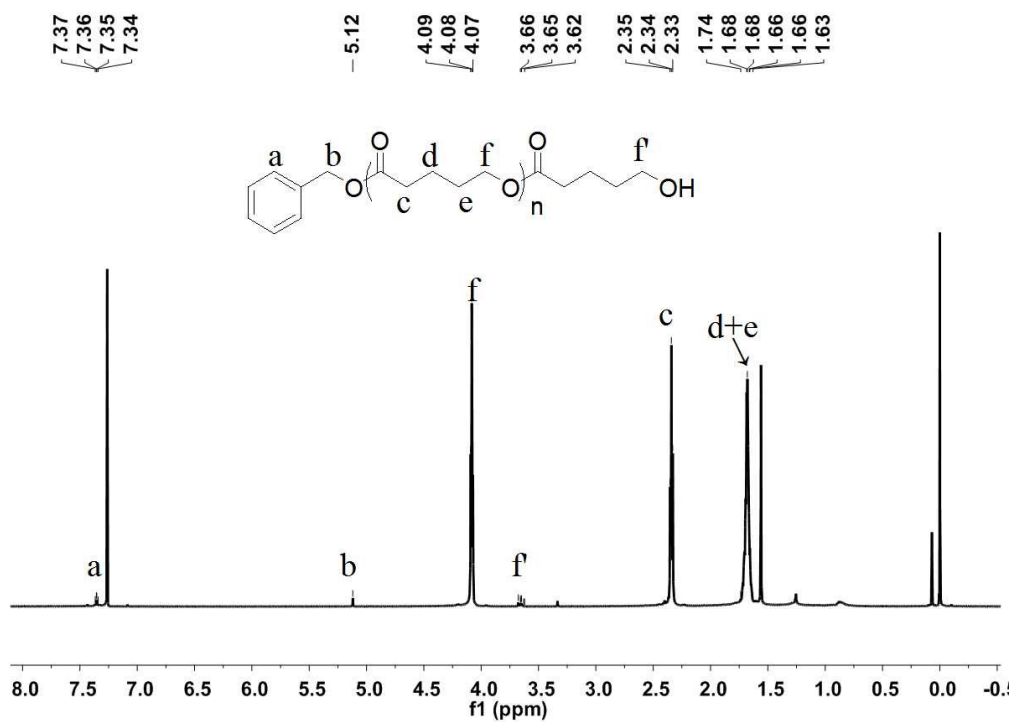

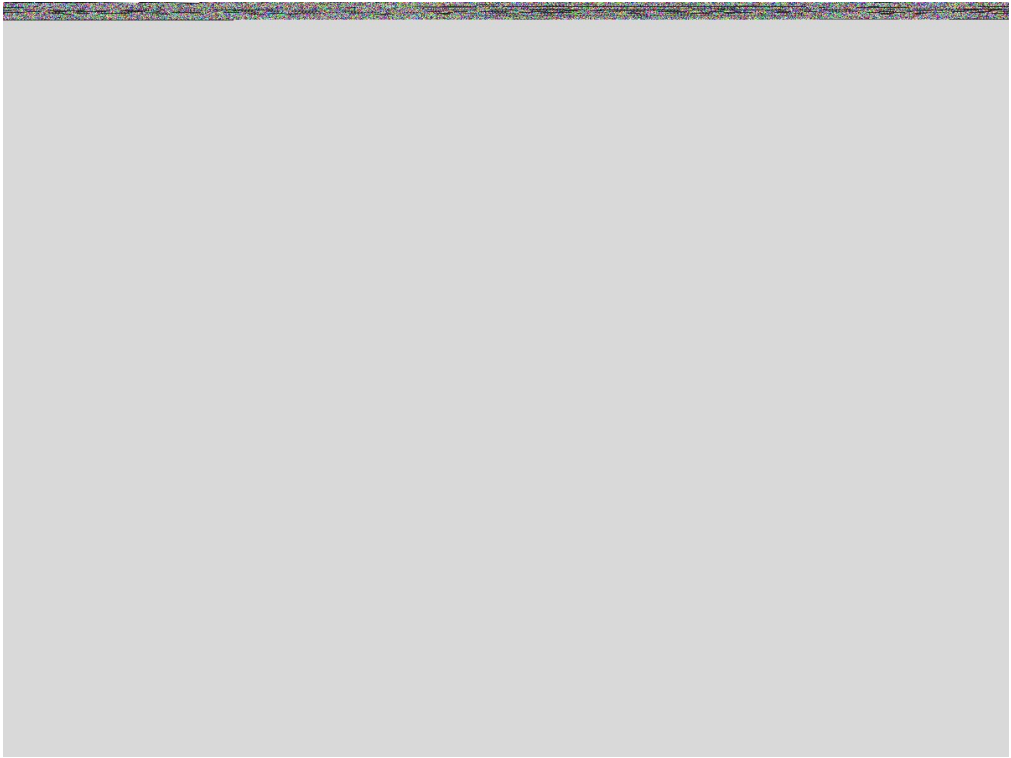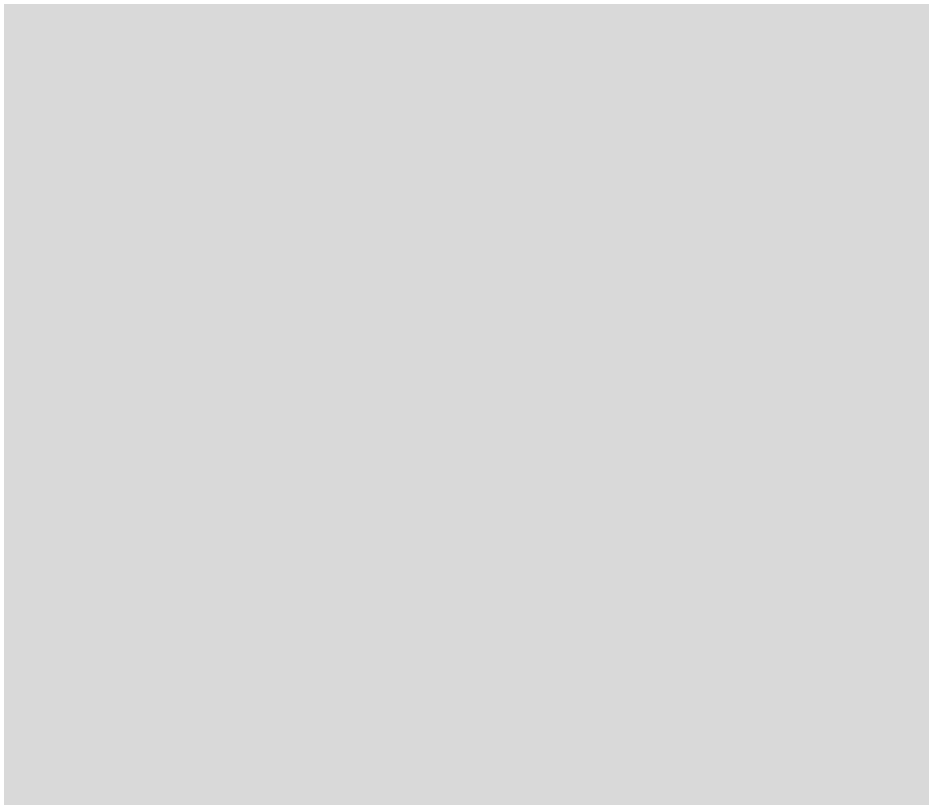

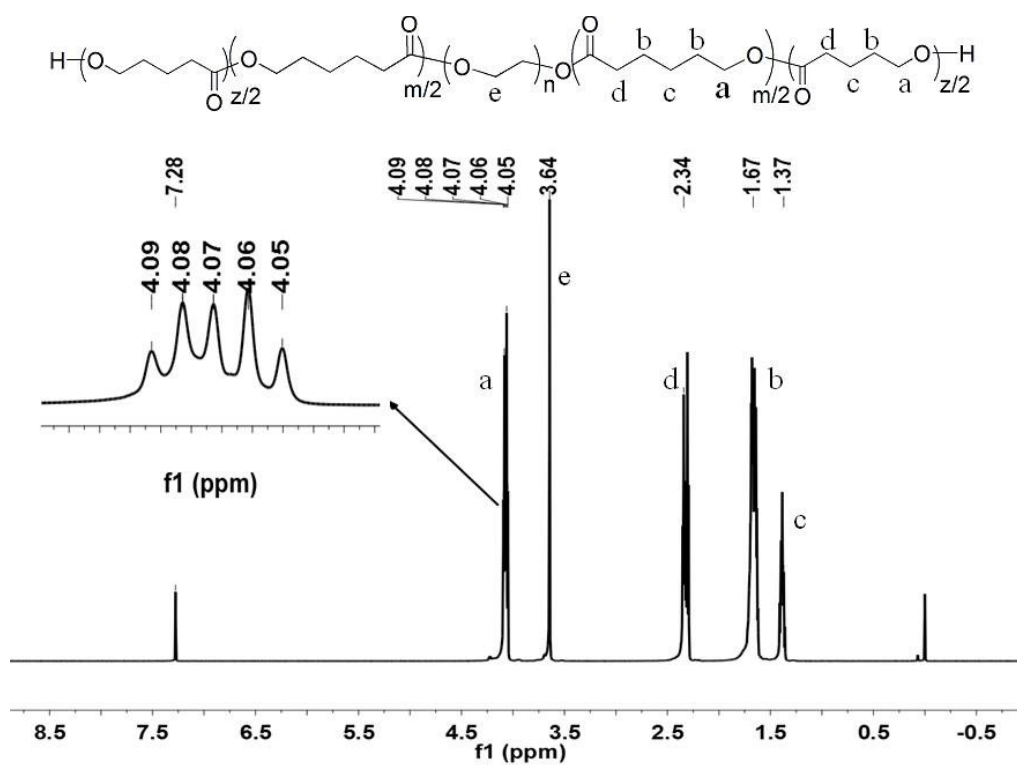

Fig. S4 <sup>1</sup>H NMR spectra of PVL, PCL and PVL-PCL-PEG-PCL-PVL.

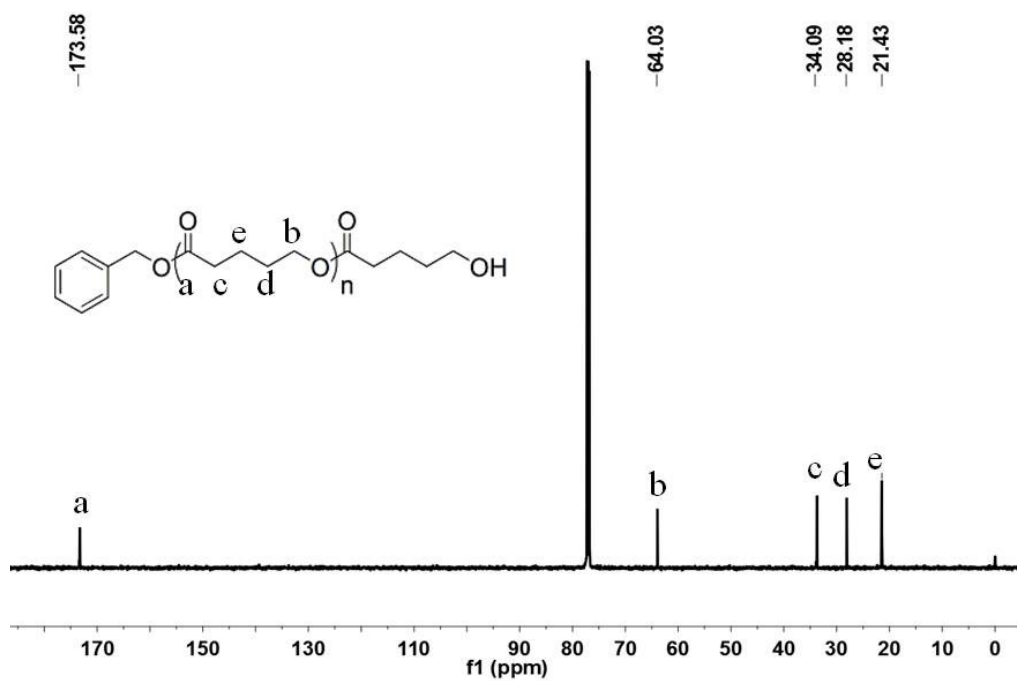

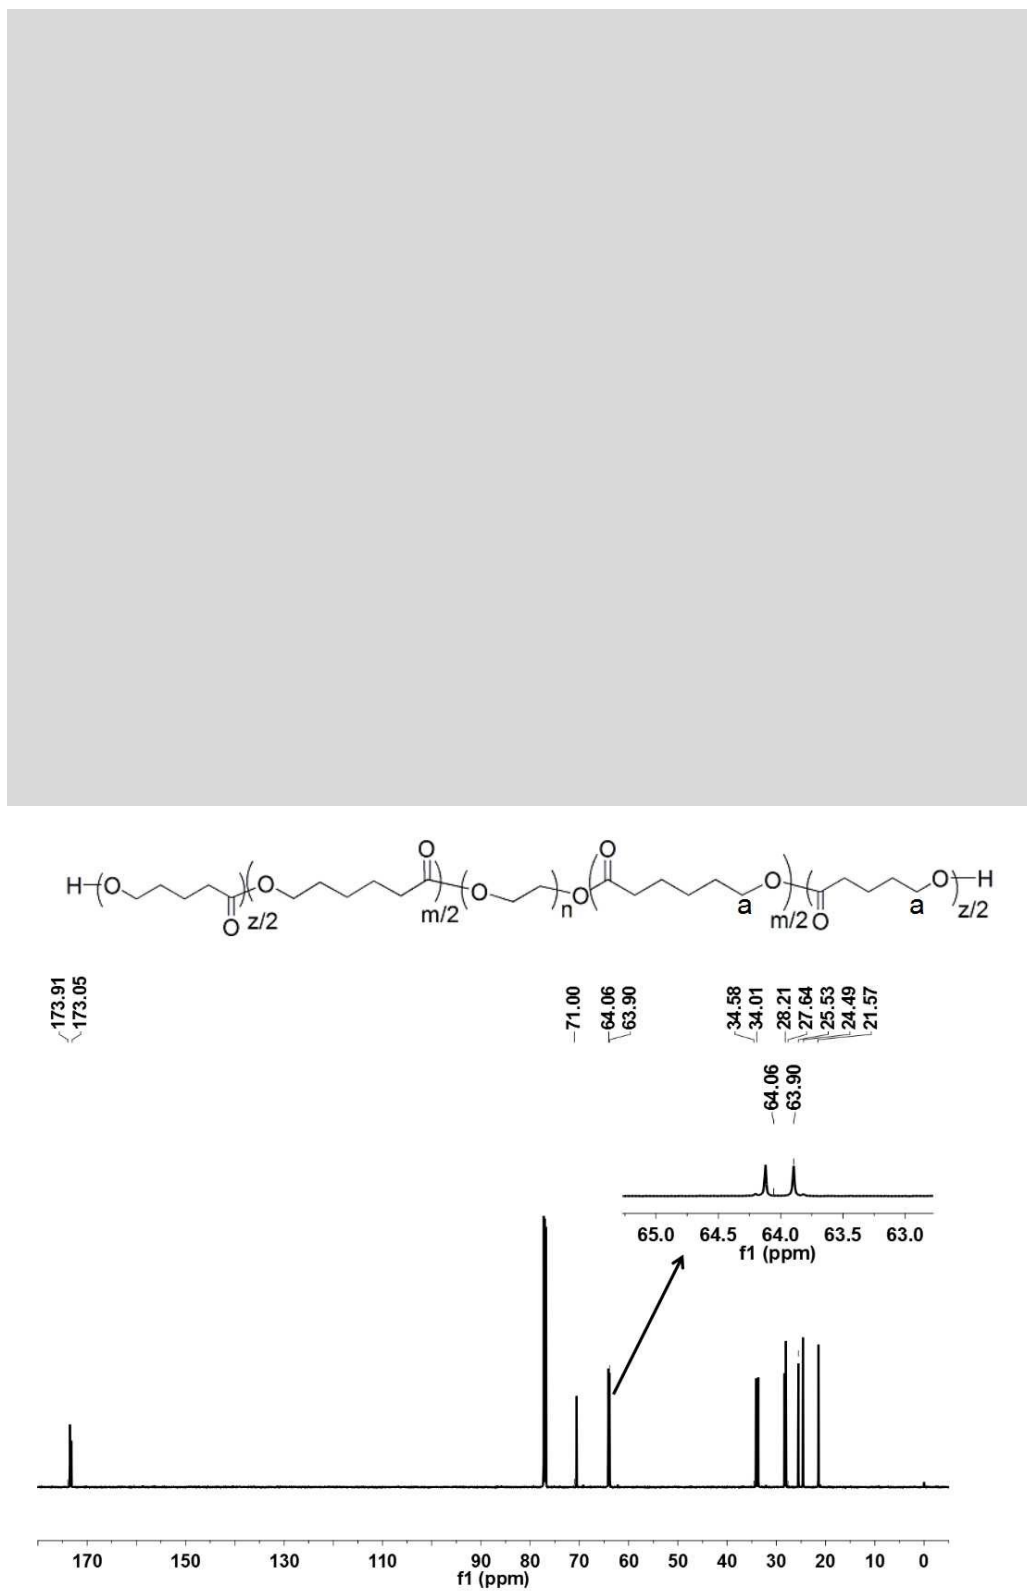

**Fig. S5**  $^{13}\text{C}$  NMR spectra of PVL, PCL and PVL-PCL-PEG-PCL-PVL.
